# Supplementary material for: Rectus Femoris Cross-Sectional Area and Phase Angle asPredictors of 12-Month Mortality in Idiopathic Pulmonary Fibrosis Patients
Source: MDPI journal article supplement (doi:10.3390/nu15204473), 2023-10-22
Supplement: s1 [file s1]

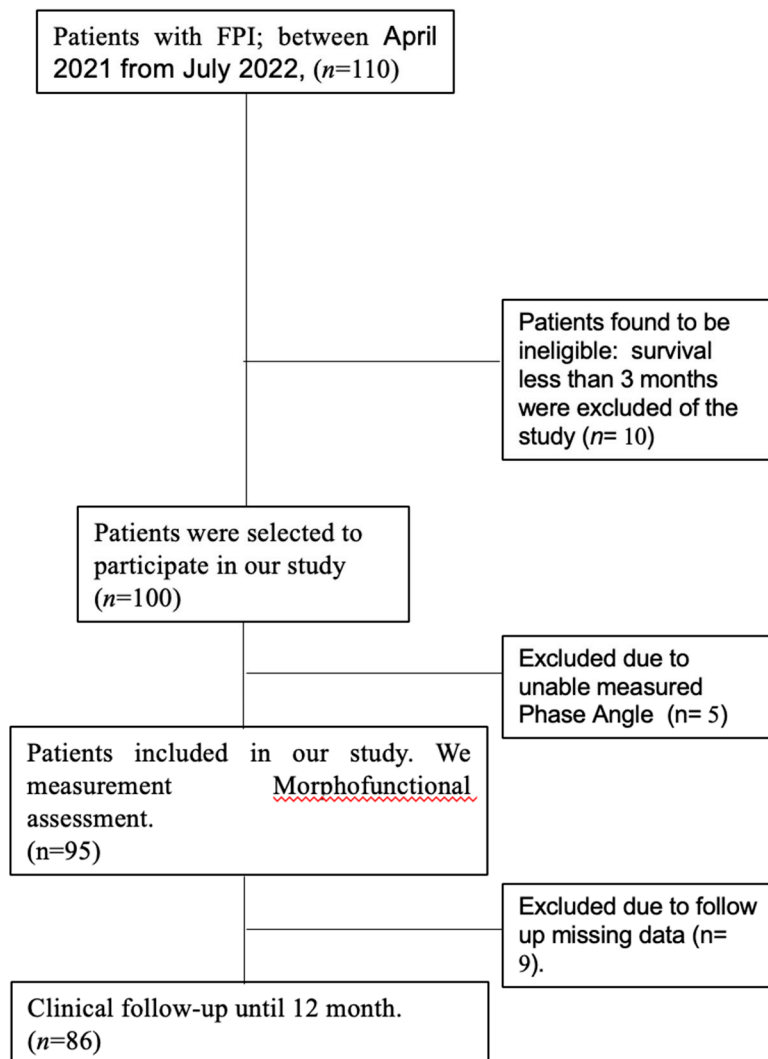

Figure S1. Flow chart in idiopathic pulmonary fibrosis patients.

**Table S1.** Baseline characteristics of the population of study divided by sex

|                                        | All                | Males              | Females            | p value           |
|----------------------------------------|--------------------|--------------------|--------------------|-------------------|
|                                        | N=86               | N=71               | N=15               |                   |
| <b>Demographic variables</b>           |                    |                    |                    |                   |
| Age (years)                            | 71.0 (7.26)        | 71.0 (6.88)        | 71.1 (9.11)        | 0.969             |
| Weight (kg)                            | 78.30 (12.1)       | 79.4 (12.0)        | 73.4 (12.0)        | 0.083             |
| Weight loss (%)                        | 6.41 (6.78)        | 6.79 (6.90)        | 4.62 (6.09)        | 0.263             |
| BMI (kg/m <sup>2</sup> )               | 27.40 (3.44)       | 27.1 (3.21)        | 28.9 (4.15)        | 0.063             |
| <b>BIA</b>                             |                    |                    |                    |                   |
| PA (°)                                 | 4.78 (0.77)        | 4.85 (0.80)        | 4.49 (0.52)        | 0.101             |
| SPA                                    | -1.03 (1.01)       | -1.08 (1.00)       | -0.763 (1.03)      | 0.267             |
| Hidratation (%)                        | 74.60(2.31)        | 74.7 (2.41)        | 74.2 (1.81)        | 0.412             |
| NaK                                    | 1.18 (0.18)        | 1.19 (0.18)        | 1.12 (0.14)        | 0.198             |
| BCM (kg)                               | <b>25.5 (5.17)</b> | <b>26.6 (4.86)</b> | <b>20.3 (2.87)</b> | <b>&lt;0.001*</b> |
| FFMI (%)                               | <b>19.0 (1.74)</b> | <b>19.3 (1.71)</b> | <b>17.8 (1.32)</b> | <b>&lt;0.001*</b> |
| FM (kg)                                | <b>23.8 (7.91)</b> | <b>22.9 (7.22)</b> | <b>28.3 (9.65)</b> | <b>0.014 *</b>    |
| SMI (cm <sup>2</sup> /m <sup>2</sup> ) | <b>8.81 (1.20)</b> | <b>9.16 (0.95)</b> | <b>7.14 (0.78)</b> | <b>&lt;0.001*</b> |
| <b>Echography exploration</b>          |                    |                    |                    |                   |
| RF-CSA (cm <sup>2</sup> )              | <b>3.38 (0.98)</b> | <b>3.57 (0.96)</b> | <b>2.49 (0.45)</b> | <b>&lt;0.001*</b> |
| RF-CIR (cm)                            | <b>8.15 (1.11)</b> | <b>8.43 (0.96)</b> | <b>6.86 (0.78)</b> | <b>&lt;0.001*</b> |
| RF-X axis (cm)                         | <b>3.43 (0.50)</b> | <b>3.55 (0.44)</b> | <b>2.91 (0.41)</b> | <b>&lt;0.001*</b> |
| RF-Y axis (cm)                         | <b>1.11 (0.27)</b> | <b>1.14 (0.28)</b> | <b>0.98 (0.16)</b> | <b>0.046*</b>     |
| L-SAT (cm)                             | <b>0.78 (0.52)</b> | <b>0.53 (0.26)</b> | <b>0.86 (0.33)</b> | <b>&lt;0.001*</b> |
| RF-CON(cm)                             | 1.57 (0.33)        | 1.59 (0.36)        | 1.49 (0.09)        | 0.601             |
| T-SAT (cm <sup>2</sup> )               | <b>1.67 (0.71)</b> | <b>1.54 (0.64)</b> | <b>2.26 (0.75)</b> | <b>&lt;0.001*</b> |
| S-SAT (cm <sup>2</sup> )               | <b>0.72 (0.30)</b> | <b>0.65 (0.24)</b> | <b>1.05 (0.33)</b> | <b>&lt;0.001*</b> |
| VAT (cm <sup>2</sup> )                 | 0.65 (0.30)        | 0.625 (0.26)       | 0.76 (0.43)        | 0.106             |
| <b>Functional measurement</b>          |                    |                    |                    |                   |
| HGS max (kg)                           | <b>34.5 (10.4)</b> | <b>37.5 (8.62)</b> | <b>20.7 (5.44)</b> | <b>&lt;0.001*</b> |
| HGS mean (kg)                          | <b>33.0 (10.1)</b> | <b>36 (8.31)</b>   | <b>19.2 (4.70)</b> | <b>&lt;0.001*</b> |
| TUG (s)                                | 8.29 (5.24)        | 7.96 (5.31)        | 9.85 (4.72)        | 0.222             |
| 6MW (m)                                | 405.0 (76.2)       | 410 (77.5)         | 375 (64.1)         | 0.263             |
| <b>Biochemical variables</b>           |                    |                    |                    |                   |
| Glucose (mg/dL)                        | 110 (38.3)         | 113 (39.4)         | 85.0 (4.58)        | 0.242             |
| Urea (mg/dL)                           | <b>43.5 (14.8)</b> | <b>45.8 (12.4)</b> | <b>27.6 (23.3)</b> | <b>0.043*</b>     |
| Creatinine (mg/dL)                     | 1.05 (0.25)        | 1.07 (0.25)        | 0.83 (0.07)        | 0.202             |
| Total cholesterol (mg/dL)              | 198 (58.8)         | 192 (54.3)         | 199 (40.7)         | 0.064             |
| Triglycerides (mg/dL)                  | 142 (90.5)         | 142 (95.6)         | 142 (48.1)         | 0.996             |
| HbA1c (%)                              | 5.97 (1.18)        | 6.07 (1.21)        | 5.10 (0.79)        | 0.470             |
| Proteins (g/dL)                        | 6.90 (0.42)        | 6.98 (0.62)        | 6.96 (0.46)        | 0.673             |
| Albumin (g/dL)                         | 3.81 (0.35)        | 3.86 (0.36)        | 3.55 (0.21)        | 0.288             |
| Pre-albumin (mg/dL)                    | 19.6 (32.7)        | 22.5 (3.67)        | 29.0 (5.30)        | 0.096             |
| CRP (mg/L)                             | 37.0 (138.0)       | 38.9 (142)         | 0.00 (0.00)        | 0.791             |

|                                      | All         | Males        | Females     | p value       |
|--------------------------------------|-------------|--------------|-------------|---------------|
|                                      | N=86        | N=71         | N=15        |               |
| Vit D (mg/dl)                        | 23.3 (14.2) | 21.0 (13.5)  | 19.0 (14.0) | 0.223         |
| FCV(%)                               | 67.9 (15.9) | 67.4 (14.8)  | 69.4 (21.6) | 0.682         |
| FEV1(%)                              | 77.9 (19.4) | 76.5 (17.7)  | 83.2 (25.3) | 0.271         |
| <b>Clinicopathological variables</b> |             |              |             |               |
| Diagnostic (month)                   | 15.5 (19.2) | 32.2 (20.8)  | 24.2 (12.2) | 0.746         |
| GAP Stage:                           |             |              |             | <b>0.034*</b> |
| I                                    | 26 (34.2%)  | 18.0 (23.7%) | 8.0 (10.5%) |               |
| II                                   | 36 (47.4%)  | 32.0 (42.1%) | 4.0 (5.30%) |               |
| III                                  | 14 (18.4%)  | 13.0 (17.1%) | 1.0 (1.30%) |               |

Data are expressed as mean  $\pm$  standard deviations or percentage. Groups were divided 12 months-mortality variable. Asterisk indicates significant difference between groups, according to

Welch's two sample test (\* $p < 0.05$ ). Chi squared test was used for variables expressed as percentage (\*\* $p < 0.001$ , \*\* $p < 0.01$ , \* $p < 0.05$ ). Data are expressed as mean  $\pm$  standard deviations or percentage. Groups were divided 12 months-mortality variable. Asterisk indicates significant difference between groups, according to Welch's two sample test (\* $p < 0.05$ ). Chi squared test was used for variables expressed as percentage (\*\* $p < 0.001$ , \*\* $p < 0.01$ , \* $p < 0.05$ ).

**Abbreviations:** BMI: Body mass index; BIVA: Bioelectrical Impedance Vectorial Analysis; Pha: phase angle; Spha: Standardized phase angle; NaK: sodium potassium index; BCM.: Body mass cell; FFM: Fat free mass; ASMM: Apendicular skeletal mass muscle; SMI: Skeletal mass index; ; FFMi: Fat free mass index; FM: Fat mass; HGS mean: mean hand grip strenght; HGS max: maximum hand grip strenght; TUG: Up & Go test; 6MWT (6 minuts walk test); RF- CIR: circumference of quadriceps rectus femoris; RF-CSA: rectus femoris cross-sectional area; RF-X Axis; rectus femoris X axis; RF-Y Axis: rectus femoris Y axis; L-SAT: leg subcutaneous adipose tissue; SAT: Abdominal subcutaneous adipose Tissue, total (T), superficial (S) and VAT: visceral adipose tissue; FCV: forced vital capacity; FEV1: forced expiratory volume in the first second; DLCO: Pulmonary carbon monoxide diffusing capacity; GAP: gender (G), age (A) and physiology (P) index; SGA: subjective global assestment.
